# Supplementary material
Source: PubMed Central journal article supplement (PMC6058770)
Supplement: 2018_191122-Disclosures_and_Contributions.pdf [file 2018_191122-Disclosures_and_Contributions.pdf]

Haematologica  
HAEMATOL/2018/191122  
Version 3

Safety and efficacy of daratumumab in dialysis-dependent renal failure  
secondary to multiple myeloma

Serena Rocchi, Paola Tacchetti, Lucia Pantani, Katia Mancuso,  
Beatrice Zannetti, Michele Cavo, and Elena Zamagni

Disclosures: MC received honoraria from and is part of advisory boards for Janssen, Celgene, Amgen, Takeda, BMS, Novartis. EZ received honoraria from and is part of advisory boards for Janssen, Celgene, Amgen, Takeda, BMS. PT received honoraria from Janssen, Celgene, Amgen, BMS. All other authors declare no relevant competing financial interests.

Contributions: SR collected data of patient and wrote the manuscript; PT helped for literature research and references; LP, KM, BZ helped for data collection; MC and EZ reviewed the report.
